# Supplementary material
Source: bioRxiv or medRxiv preprint supplement (https://www.biorxiv.org/highwire/filestream/28069/field_highwire_adjunct_files/4/099168-5.pdf)
Supplement: Supplementary file [file 099168-5.pdf]

**Supplementary Table 2**

Overall statistics for each annotation set and related genomes

| <b>Annotation set</b>                        | <b>Gene Models</b> | <b>mRNAs</b> | <b>Total Number of Exons</b> |
|----------------------------------------------|--------------------|--------------|------------------------------|
| <b>NCBI v100</b>                             | 19311              | 20966        | 113609                       |
| <b>MCOT v1.0</b>                             | 30562              | 30562        | NA                           |
| <b>Mapped MCOT v1.0</b>                      | 19744              | 19744        | 89423                        |
| <b>Maker v1.1 BCM</b>                        | 18205              | 18205        | 94257                        |
| <b>Curated genes</b>                         | 530                | 572          | 3482                         |
|                                              |                    |              |                              |
| <b><i>Drosophila melanogaster</i></b>        | 13929              | 30482        | 77689                        |
| <b><i>Acyrtosiphon pisum</i> (pea aphid)</b> | 20958              | 30790        | 238155                       |
| <b><i>Oncopeltus fasciatus</i></b>           | 19589              | 19746        | 104329                       |
| <b><i>Cimex lectularius</i> (bed bug)</b>    | 14085              | 14212        | 89562                        |

| Total Number of Introns | Number of Exons Per mRNA | Average mRNA length | Average Exon Length |
|-------------------------|--------------------------|---------------------|---------------------|
| 92613                   | 5.42                     | 1,317               | 243                 |
| NA                      | NA                       | 1,996               | NA                  |
| 69679                   | 4.53                     | 1,724               | 381                 |
| 76052                   | 5.18                     | 1,018               | 197                 |
| 2910                    | 6.09                     | 1,478               | 243                 |
|                         |                          |                     |                     |
| 58534                   | 2.55                     | 1,374               | 539                 |
| 206612                  | 7.73                     | 2,039               | 264                 |
| 84581                   | 5.28                     | 903                 | 171                 |
| 75350                   | 6.3                      | 1,211               | 192                 |

| <b>Total Exon length (bp)</b> |
|-------------------------------|
| 27,605,237                    |
| 60,995,906                    |
| 34,029,470                    |
| 18,536,849                    |
| 845,582                       |
|                               |
| 41,874,371                    |
| 62,788,971                    |
| 17,821,062                    |
| 17,206,103                    |
